# Supplementary material
Source: publisher site journal article supplement (https://www.dovepress.com/article/379337)

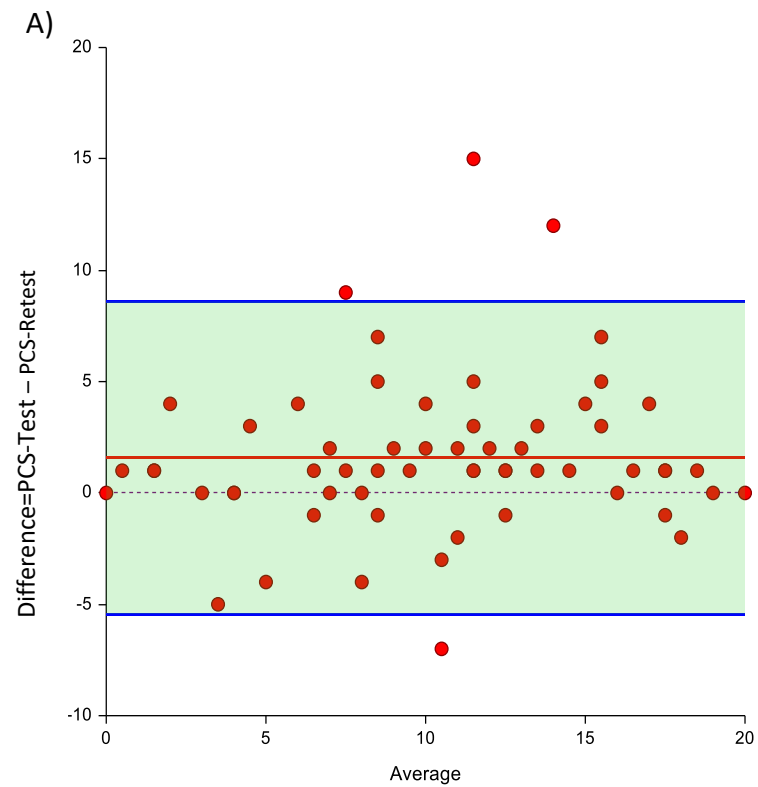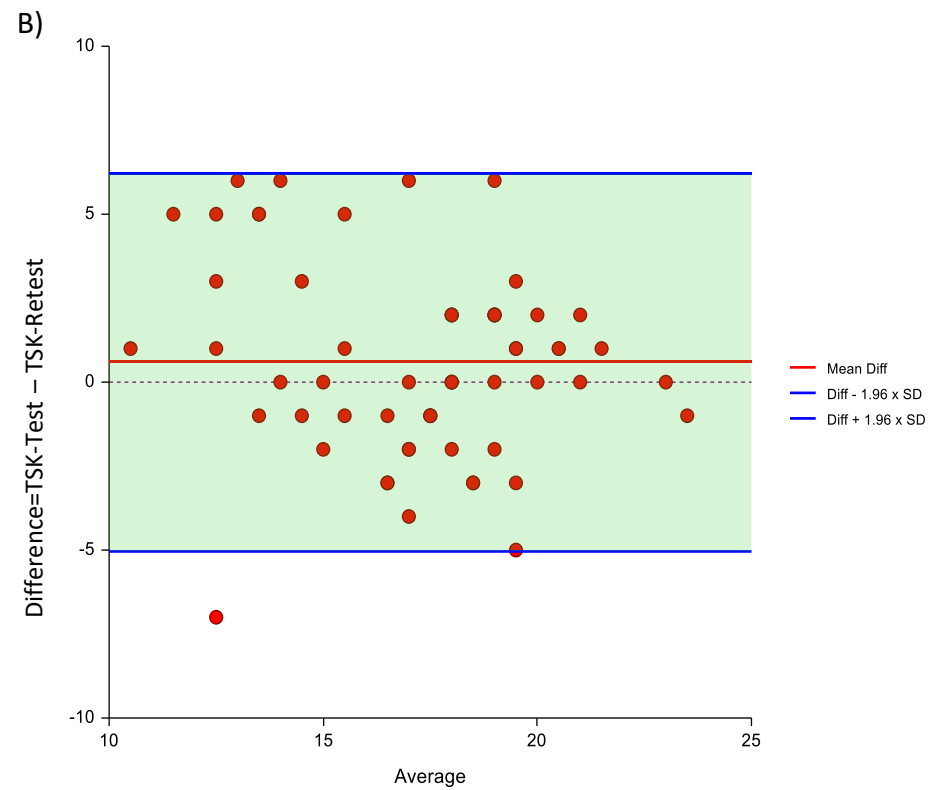

Supplement: Supplementary file 1 [file Supplementary-Data-1.pdf › Supplementary-Data-1.pdf]
